# Supplementary material for: Cost and Effectiveness of Blended Versus Standard Cognitive Behavioral Therapy for Outpatients With Depression in Routine Specialized Mental Health Care: Pilot Randomized Controlled Trial
Source: PubMed Central journal article supplement (PMC6914243; doi:10.2196/14261), 2019-10-29
Supplement: jmir_v21i10e14261_app2.pdf [file jmir_v21i10e14261_app2.pdf]

Multimedia Appendix 2. Compliance with questionnaires at follow-up.<sup>a</sup>

| Time-point             | Blended CBT<br>N=53 | Standard CBT<br>N=49 | Total sample<br>N=102 |
|------------------------|---------------------|----------------------|-----------------------|
| <i>T1 (10 weeks)</i>   | n=41                | n=35                 | n=76                  |
| Mean (SD)              | 11.4 (2.0)          | 10.6 (1.2)           | 11.0 (1.7)            |
| Median, range          | 10, 10-19           | 10, 10-15            | 10, 10-19             |
| Quartiles (25, 50, 75) | 10, 10, 12          | 10, 10, 11           | 10, 10, 11            |
| <i>T2 (20 weeks)</i>   | n=35                | n=30                 | n=65                  |
| Mean (SD)              | 20.9 (1.5)          | 21.0 (1.7)           | 20.9 (1.6)            |
| Median, range          | 20, 20-26           | 20, 20-28            | 20, 20-28             |
| Quartiles (25, 50, 75) | 20, 20, 21          | 20, 20, 21           | 20, 20, 21            |
| <i>T3 (30 weeks)</i>   | n=36                | n=29                 | n=65                  |
| Mean (SD)              | 32.1 (2.8)          | 32.0 (3.1)           | 32.1 (2.9)            |
| Median, range          | 31, 30-44           | 31, 30-43            | 31, 30-44             |
| Quartiles (25, 50, 75) | 30, 31, 33          | 30, 31, 32           | 30, 31, 33            |

<sup>a</sup>CBT: Cognitive behavioral therapy; SD: standard deviation.
